# Supplementary figures and images for: Effect of ferric iron and nitrate on hydrogen sulfide control in lab-scale reactors
Source: Royal Society of Chemistry journal article supplement (doi:10.1039/d1ew00460c), 2021-01-01

## Appendix

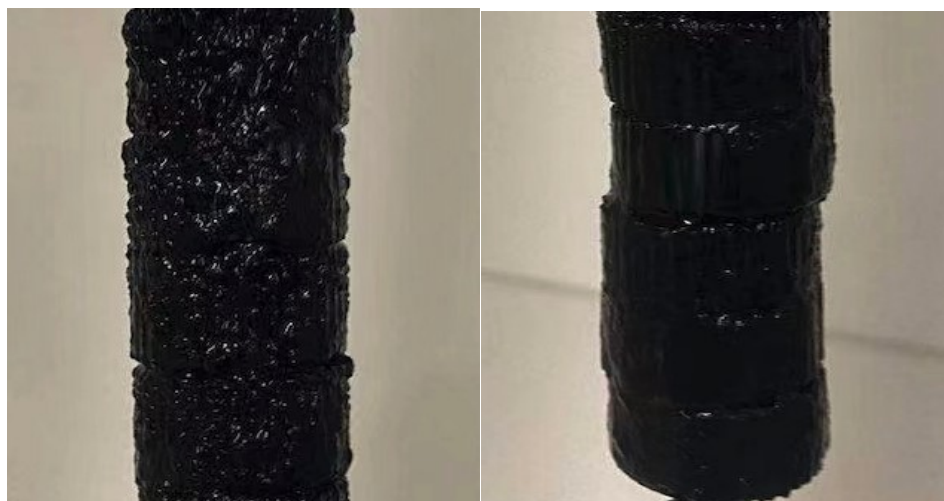

**Figure S1** Carriers with biofilm in R1(left) and R4 (right)

Supplement: d1ew00460c1.pdf [file d1ew00460c1.pdf]
